# Supplementary material for: Interpretation of Recent Antarctic Sea Ice Loss: The Key Role of the Southern Annular Mode during the Seasonal Sea Ice Maximum
Source: Research Square preprint supplement (doi:10.21203/rs.3.rs-6207339/v1), 2025-03-26
Supplement: Supplementary file 1 [file 3bf2ab6b4ee29022825ecd7e.pdf]

**Supplementary information for:**  
**Interpretation of Recent Antarctic Sea Ice Loss:**  
**The Key Role of the Southern Annular Mode During the Seasonal Sea Ice Maximum**

Chloe L. Boehm<sup>1</sup>, David W. J. Thompson<sup>1,2</sup>, and Edward Blanchard-Wrigglesworth<sup>3</sup>

<sup>1</sup> *Department of Atmospheric Sciences, Colorado State University, Fort Collins, CO, USA*

<sup>2</sup> *School of Environmental Sciences, University of East Anglia, Norwich, UK*

<sup>3</sup> *Department of Atmospheric and Climate Science, University of Washington, Seattle, WA, USA*

*Corresponding author:* Chloe L. Boehm, [chloe.boehm@colostate.edu](mailto:chloe.boehm@colostate.edu)

**Supplementary Figure List**

Supplementary Figure 1: Monthly spatial regressions onto the March SAM index.

Supplementary Figure 2: Monthly spatial regressions onto the July SAM index.

Supplementary Figure 3: Monthly spatial regressions onto the August SAM index.

Supplementary Figure 4: Quantifying the amount of SIA variance explained by the SAM.

Supplementary Figure 5: Regressions of SIA onto the SAM for the period from 1979-2015.

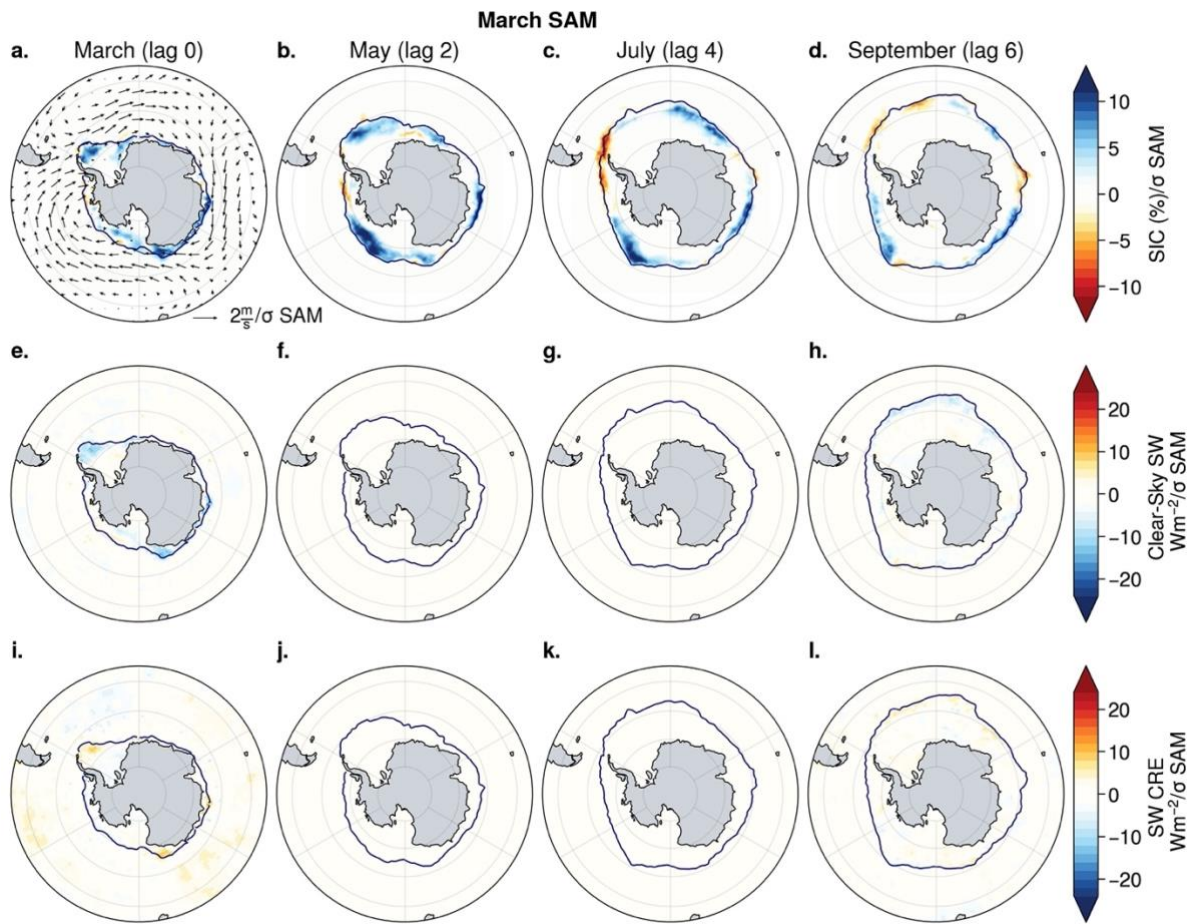

**Supplementary Figure 1.** As in Fig. 3, but for regressions onto standardized March values of the SAM index

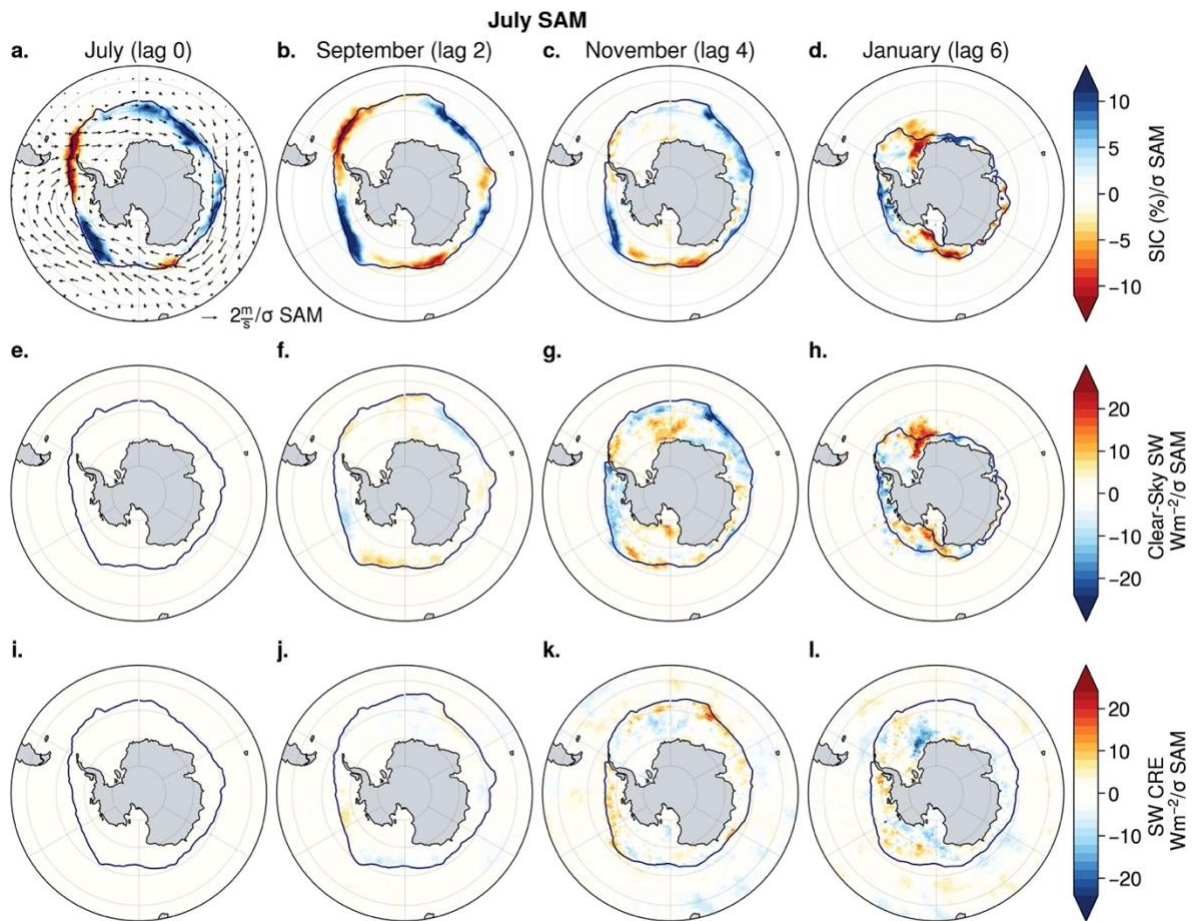

**Supplementary Figure 2.** As in Fig. 3, but for regressions onto standardized July values of the SAM index

31  
32

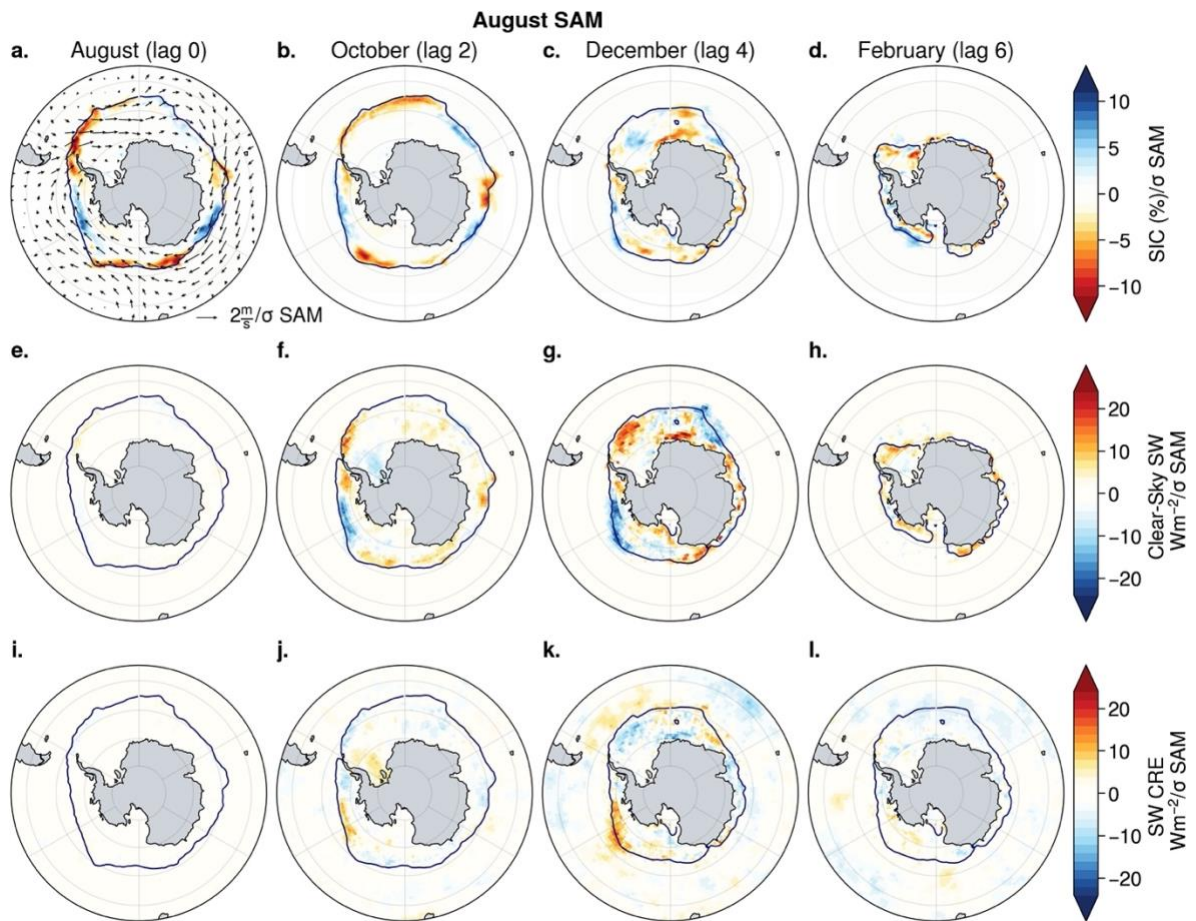

**Supplementary Figure 3.** As in Fig. 3, but for regressions onto standardized August values of the SAM index

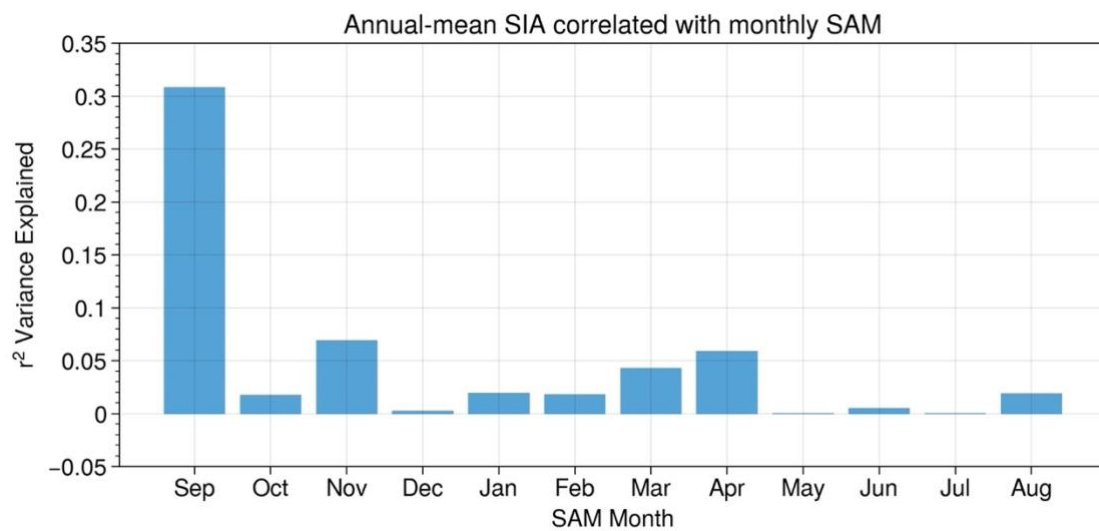

**Supplementary Figure 4.** As in Fig. 5a, but for the variance in annual-mean SIA anomalies explained by variations in the SAM index during the indicated month. For example: Results for September indicate the correlation squared between September-August (during the following year) mean values of SIA and September values of the SAM index, etc.

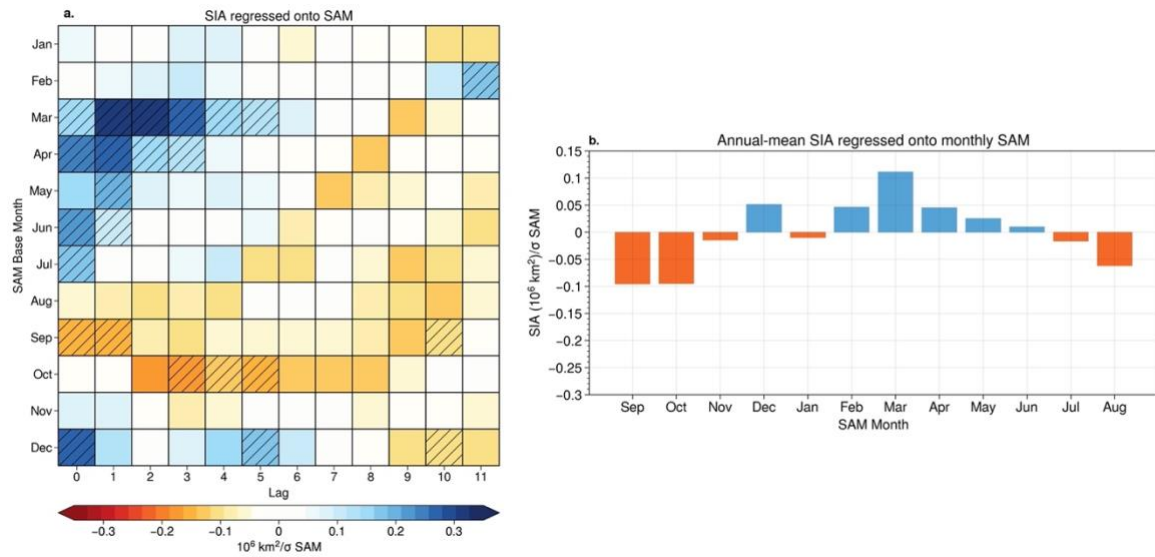

**Supplementary Figure 5.** As in Figs. 2b and 5a but for data limited to the period 1979-2015.
